# Supplementary material for: Olive oil intake is inversely related to cancer prevalence: a systematic review and a meta-analysis of 13800 patients and 23340 controls in 19 observational studies
Source: Springer Nature journal article supplement (doi:10.1186/1476-511x-10-127), 2011-01-01

# Forest Plot of Log(Hazard Ratio)

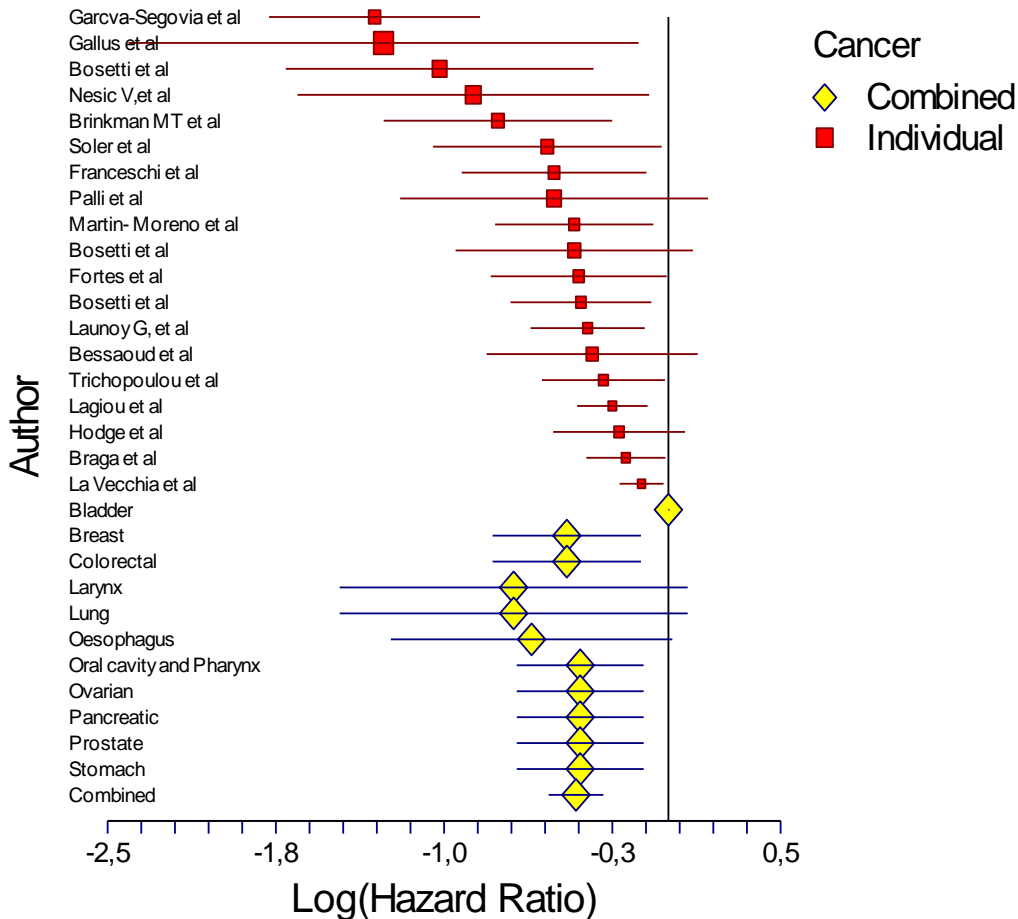

Supplement: 12944_2011_526_MOESM1_ESM.pdf [file 12944_2011_526_MOESM1_ESM.pdf]
